# Supplementary material for: How Random Is Social Behaviour? Disentangling Social Complexity through the Study of a Wild House Mouse Population
Source: PLOS journal article supplement (doi:10.1371/journal.pcbi.1002786), 2012-11-29
Supplement: S6 (10.1371/journal.pcbi.1002786.s006) [file journal.pcbi.1002786.s006]

301 Moved Permanently

# Moved Permanently

The document has moved here.

---

Apache Server at www.ploscompbiol.org Port 80
